# Supplementary material
Source: Springer Nature journal article supplement (https://www.springermedizin.de/resource/supplementary/12943_2014_1365_MOESM8_ESM.pdf/9552816)

**A**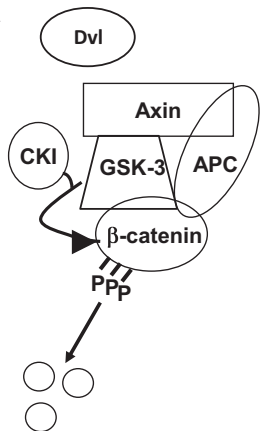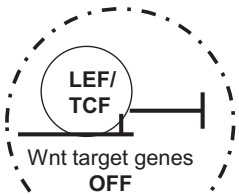**B**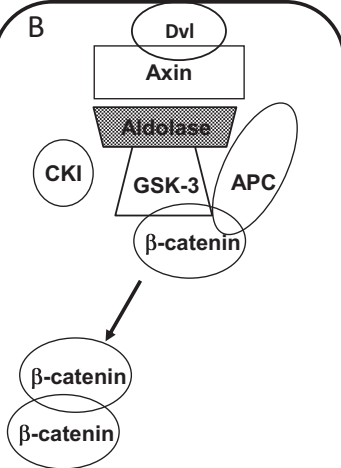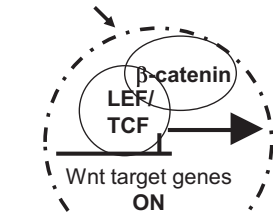

Supplement: MOESM8 [file 9552816]
